# Supplementary material for: A Logic-Tree Based Probabilistic Seismic Hazard Assessment for the Central Ionian Islands of Cephalonia and Ithaca (Western Greece)
Source: Research Square preprint supplement (doi:10.21203/rs.3.rs-3991269/v1), 2024-02-29
Supplement: Supplementary file 1 [file 6fb62a5a64713865d77721fe.xlsx]

## Sheet: Φύλλο1
ESHM13
Source Area	N-FM (%)	NN-FM (%)	Mmaxobs	MuRWC	Mmaxobs+0.5	McGP23	b-valueGP23	λ(McGP23)	McMAXC	b-valueMAXC	λ(McMAXC)		N-FM (%)	Normal focal mechanism (%)
GRAS369	0.14	0.86	6.5	6.8	7	4.8	1.19	0.82	4.1	0.81	2.69		NN-FM (%)	Non-Normal focal mechanism (%)
GRAS370	0.07	0.93	6.5	6.6	7	5.6	1.07	0.07	4.4	0.7	0.63		Mmaxobs	Maximum observed Mw
GRAS371	0.13	0.87	7	7.2	7.5	5.1	1.1	0.64	4.1	0.92	4.88		MuRWC	Maximum expected magnitude via the RWC method
GRAS372	0.13	0.87	6.6	6.6	7.1	4.9	1.05	0.63	4.1	0.9	3.42		Mmaxobs+0.5	Maximum observed Mw + 0.5 positive factor
GRAS375	0.25	0.75	6.3	6.6	6.8	4.6	1.13	1.07	4.1	0.82	2.4		McGP23	Magnitude of completeness using the method of Godano and Petrillo (2023)
GRAS384	0.76	0.24	5.7	5.7	6.2	4.7	1.05	0.41	4.1	0.88	1.23		b-valueGP23	The b-value using the method of Godano and Petrillo (2023)
GRAS385	0.93	0.07	6.1	6.1	6.6	5.4	1	0.05	4.4	0.6	0.37		λ(McGP23)	Annual rate of Mc
GRAS386	0.72	0.28	6.6	6.6	7.1	5.7	1	0.08	4.4	0.73	1.24		McMAXC	Magnitude of completeness using the maximum curvature method
GRAS421	0.13	0.87	6.4	6.5	6.9	4.2	1.04	2.19	4.1	1.04	2.99		b-valueMAXC	The b-value using the using the maximum curvature method
GRAS975	0.07	0.93	6.6	6.6	7.1	4.9	1.05	0.68	4.4	0.71	2.22		λ(McMAXC)	Annual rate of Mc
GRAS976	0.83	0.17	6.4	6.4	6.9	5.7	1.08	0.12	4.1	0.89	3.48
ESHM20
Source Area	N-FM (%)	NN-FM (%)	Mmaxobs	MuRWC	Mmaxobs+0.5	McGP23	b-valueGP23	λ(McGP23)	McMAXC	b-valueMAXC	λ(McMAXC)
GRAS237	0.02	0.98	5.9	5.9	6.4	4.5	1.05	0.79	4.1	1.04	2.14
GRAS241	0.84	0.16	6.4	6.4	6.9	5.6	1.03	0.17	4.1	0.87	3.67
GRAS247	0.76	0.24	5.7	5.7	6.2	4.7	1.01	0.42	4.1	0.86	1.2
GRAS251	0.13	0.87	7	7.2	7.5	5.1	1.15	1.04	4.1	0.84	7.03
GRAS256	0.39	0.61	5.4	5.5	5.9	4.2	1.02	0.3	4.1	1.08	0.42
GRAS257	0.21	0.79	6.3	6.6	6.8	4.6	1.1	0.5	4.4	0.75	0.78
GRAS266	0.59	0.41	7.6	8	8.1	6.2	1	0.05	4.4	0.64	1.64
GRAS267	0.08	0.92	6.6	6.6	7.1	6	1	0.05	4.4	0.66	1.83
GRAS272	0.72	0.28	6.6	6.6	7.1	5.7	1	0.08	4.4	0.73	1.32
BON20
Source Area	N-FM (%)	NN-FM (%)	Mmaxobs	MuRWC	Mmaxobs+0.5	McGP23	b-valueGP23	λ(McGP23)	McMAXC	b-valueMAXC	λ(McMAXC)
BO1	0.15	0.85	5.8	5.8	6.3	4.8	1.01	0.33	4.1	0.85	1.25
BO2	0.09	0.91	6.5	6.6	7	5.5	1.03	0.06	4.4	0.71	0.54
BO3	0.15	0.85	6.3	6.4	6.8	5.5	1.08	0.05	4.1	0.64	0.29
BO4	0.09	0.92	6.2	6.2	6.7	5	1.1	0.23	4.1	0.93	1.48
BO5	0.15	0.85	6.7	7	7.2	4.3	1.15	1.48	4.1	1.09	2.4
BO6	0.14	0.86	6.1	6.2	6.6	4.5	1.03	0.57	4.1	0.86	1.24
BO7	0.15	0.85	6.6	6.6	7.1	5.1	1.16	0.3	4.1	0.94	2.48
BO8	0.18	0.82	6.3	6.6	6.8	4.5	1.07	0.57	4.1	0.89	1.31
BO9	0.32	0.69	5.7	5.8	6.2	4.7	1	0.16	4.1	0.88	0.53
BO10	0.13	0.87	7	7.2	7.5	6.4	1	0.02	4.6	0.96	0.59
